# Supplementary material
Source: publisher figshare collection journal article supplement (https://frontiersin.figshare.com/ndownloader/files/20023754)
Supplement: Supplementary file [file 20023754]

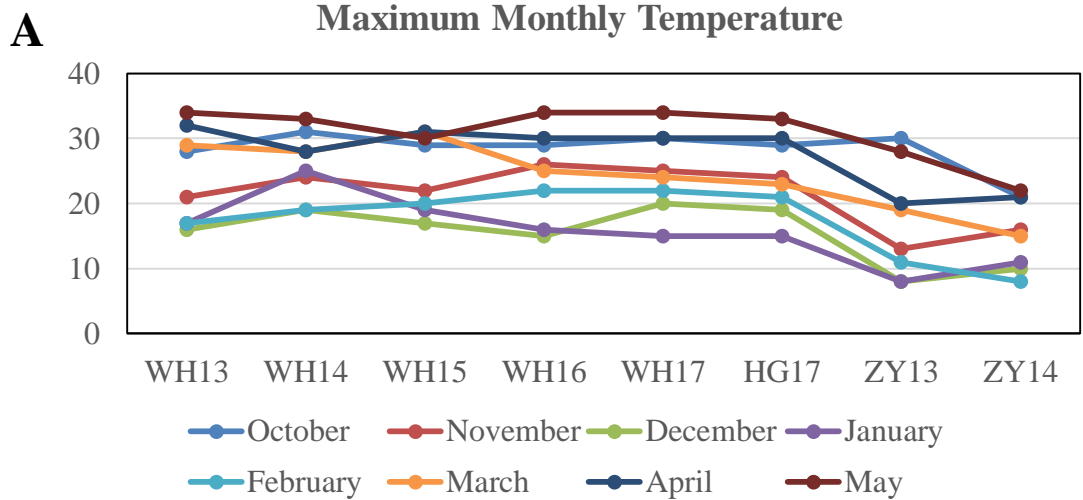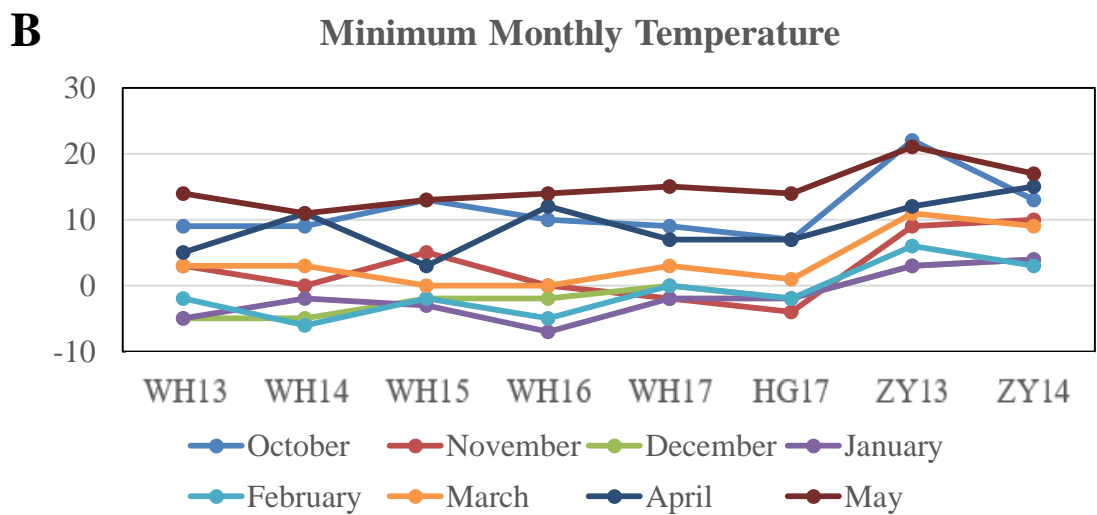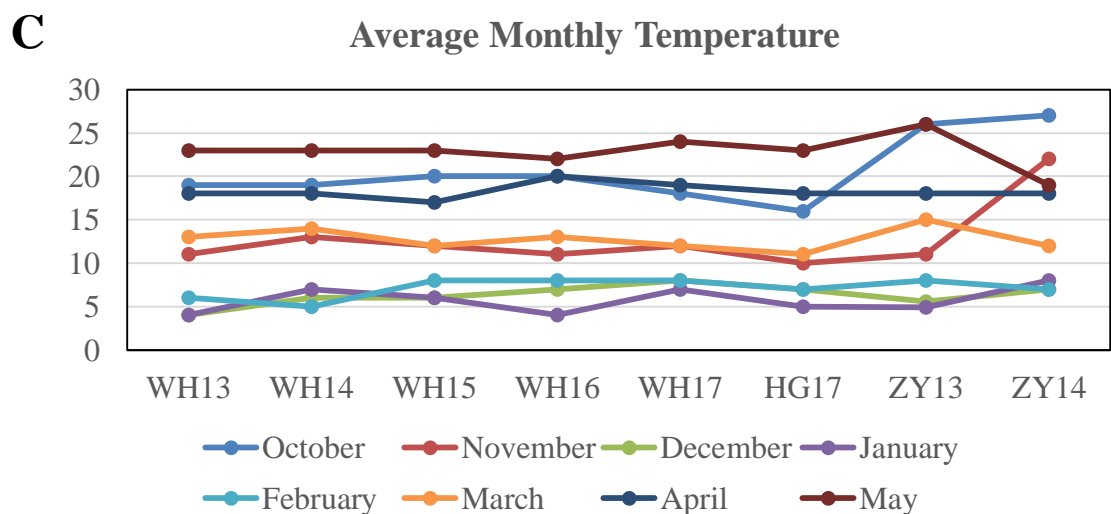

**Figure S1: Monthly temperature of growing season in Wuhan (2013-17), Huanggang (2017) and Zunyi (2013-14). A), Maximum monthly temperature of different growing season. B), Depicts minimum monthly temperature of all growing season C), Exhibit average monthly temperature of all growing season.**
